# Supplementary material for: Oncofetal Protein CRIPTO Is Involved in Wound Healing and Fibrogenesis in the Regenerating Liver and Is Associated with the Initial Stages of Cardiac Fibrosis
Source: MDPI journal article supplement (doi:10.3390/cells10123325), 2021-11-26
Supplement: s1 [file s1]

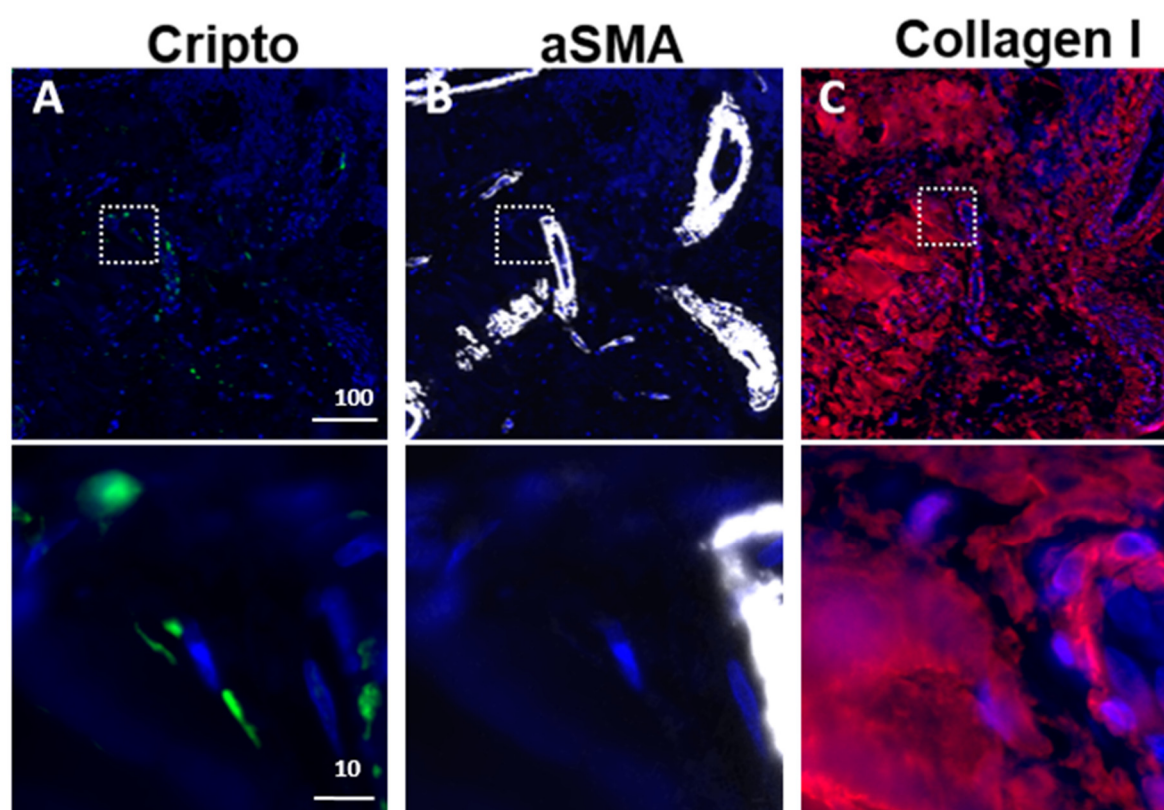

**Figure S1. Cripto expression in patients with end-stage heart failure.** Cardiac tissue samples of patients with end-stage heart failure (n=5) were stained for CRIPTO (A)  $\alpha$ SMA (B) and collagen type I (C). Scale bar 100  $\mu$ m.

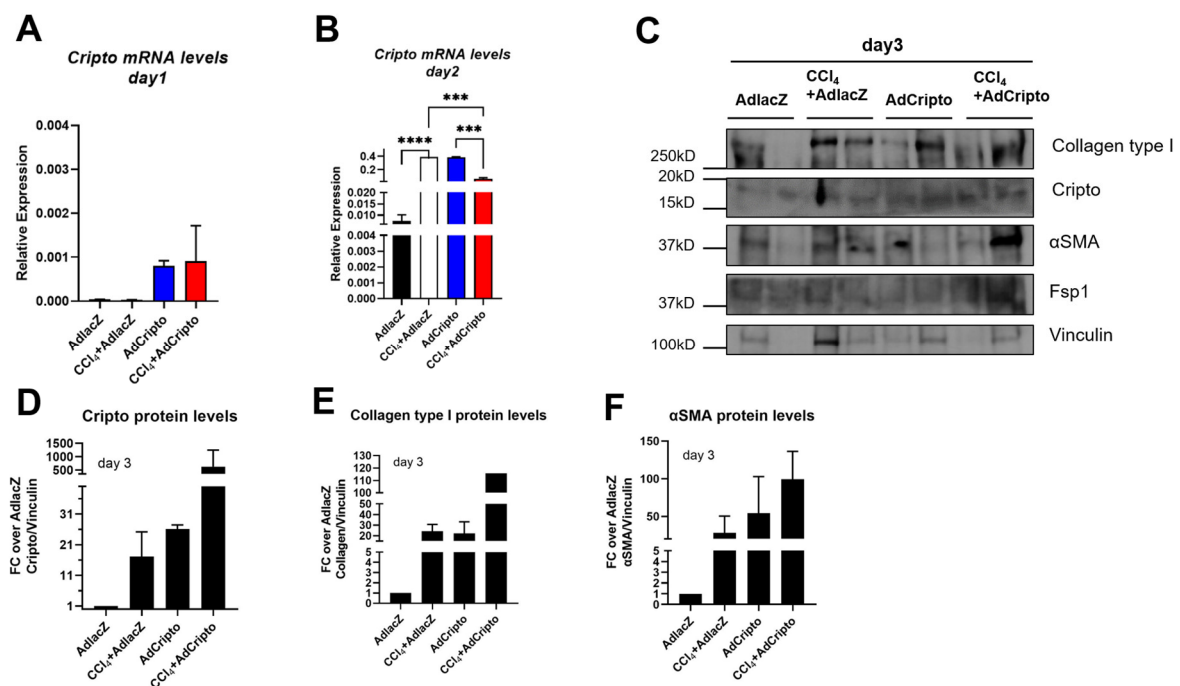

**Figure S2. Cripto overexpression in liver tissues increases protein levels of fibrotic markers.** (A-B) mRNA expression levels of *Cripto* normalized to  $\beta$ -actin in the AdCripto+/-CCl<sub>4</sub>, AdlacZ+/-CCl<sub>4</sub> liver tissues at day 1 (A) and day 2 post CCl<sub>4</sub> administration. (B) Relative expression  $\pm$ SEM among n=2 biological replicates per time point and per group. Three technical measurements were obtained per replicate. Ordinary two-way ANOVA, \*\*\*p $\leq$ 0.001, \*\*\*\*p $\leq$ 0.0001. (C) Protein levels of Collagen type I, CRIPTO,  $\alpha$ SMA and Fibroblast-specific protein-1 (FSP1) measured by Western blotting in liver tissue FFPE extracts of the AdCripto+/-CCl<sub>4</sub> and AdlacZ+/-CCl<sub>4</sub> groups. N=2 biological replicates per group. Time point: day 3 post toxin administration. Vinculin was used as protein loading control. Representative of two independent experiments. (D-F) Quantification of protein levels of CRIPTO (D), COLLAGEN Type I (E) and  $\alpha$ SMA (F) based on the Western blotting of panel (C). Data were obtained after normalization to the mean intensity of the n=2 biological replicates of the control group (AdlacZ), and to the intensity of the protein loading control (vinculin) for every sample. Mean fold change over AdlacZ  $\pm$ SEM (n=2).

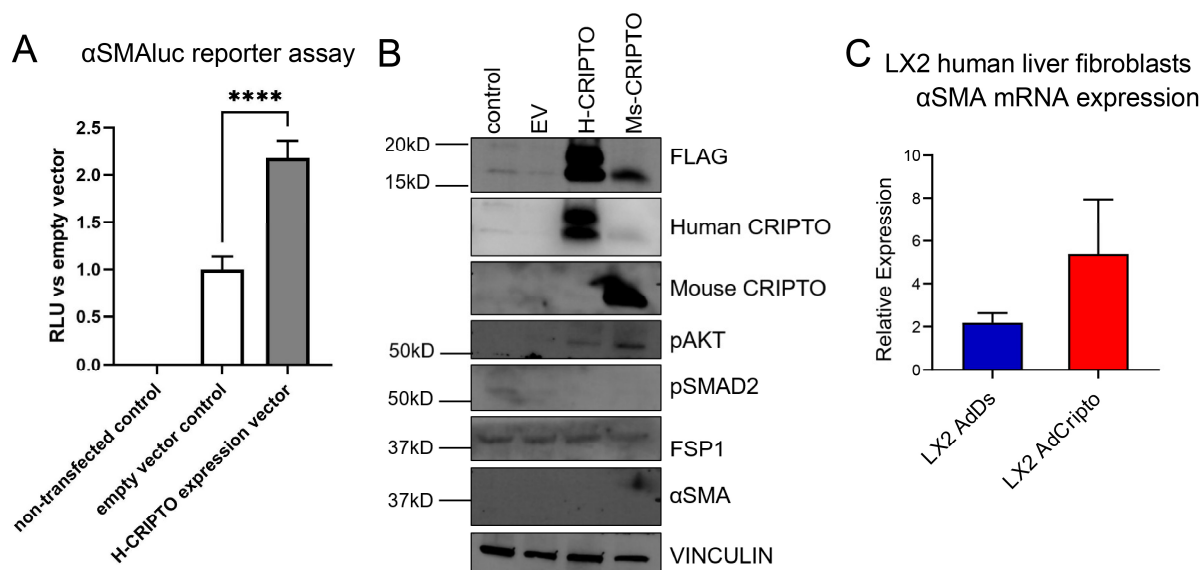

**Figure S3. CRIPTO is an upstream regulator of αSMA expression.** (A) *In vitro* αSMA luciferase reporter assay on 293T cells, transfected with empty vector or full length human CRIPTO-expressing plasmid (H-CRIPTO). Relative Luciferase (RLU) measurements were obtained 48 hours after transfection and normalized to the empty vector control. Mean±SD from quadruplicate technical replicate measurements. Unpaired t-test. \*\*\*\*p≤0.0001. (B) Protein levels measured by Western blotting in 293T cells transfected with empty vector, mouse CRIPTO-FLAG (Ms-CRIPTO) plasmid, human CRIPTO-FLAG (H-CRIPTO) plasmid. Proteins detected: human/mouse CRIPTO, FLAG (to detect CRIPTO-FLAG protein of the mouse and human expression vectors), phosphorylated AKT (pAKT), phosphorylated SMAD2 (pSMAD2), Fibroblast-specific protein-1 (FSP1) and αSMA. Time point: 48 hours after transfection. Vinculin was used as protein loading control. Representative of two independent experiments. (C) αSMA mRNA expression in LX2 human liver fibroblast cell line after adenoviral-mediated CRIPTO (AdCRIPTO) overexpression *in vitro*. AdDs; control adenovirus containing dsRED fluorescent protein.

**Table S1. Patient characteristics.** Data presented as median (range) for continuous variables and percentage (number) for categorized variables.

| Variable                             | Healthy controls<br>(N=16) | Pre-LT<br>(N=45) | Post-LT<br>(N=45) |
|--------------------------------------|----------------------------|------------------|-------------------|
| Gender (male), % (n)                 |                            |                  | 78% (35)          |
| Age (median, range)                  | 50% (8)<br>29 (23-65)      |                  | 54 (42-69)        |
| Aetiology                            |                            |                  |                   |
| - Alcoholic liver disease            |                            |                  | 25                |
| - Viral Hepatitis                    |                            |                  | 20                |
| Blood (median, range)                |                            |                  |                   |
| - AST (U/L)                          |                            | 72 (24-517)      | 27 (11-240)       |
| - ALT (U/L)                          |                            | 37 (15-360)      | 25 (8-401)        |
| - INR                                |                            | 1.2 (1-2.4)      | 1.0 (0.9-2.4)     |
| - ALP (U/L)                          |                            | 130 (50-555)     | 88 (47-487)       |
| - Creatinin ( $\mu\text{mol/L}$ )    |                            | 92 (34-171)      | 111 (68-204)      |
| - $\gamma\text{GT}$ (U/L)            |                            | 43 (7-374)       | 39 (9-1395)       |
| - Sodium (mmol/L)                    |                            | 138 (124-156)    | 142 (134-148)     |
| - Bilirubin ( $\mu\text{mol/L}$ )    |                            | 46 (5-593)       | 12 (5-29)         |
| - Platelet count ( $10^9/\text{L}$ ) |                            | 72 (30-142)      | 144 (93-243)      |
| Cripto plasma (pg/ml)                |                            | 1381 (0-12108)   | 357 (0-5314)      |
| Clinical scores                      | 0 (0-818)                  |                  |                   |
| - MELD                               |                            | 15 (8-33)        | 10 (6-18)         |

LT = Liver Transplantation, ALD = Alcoholic Liver Disease, AST = Aspartate aminotransferase, ALT = Alanine aminotransferase, INR = International Normalized Ratio, ALP = Alkaline phosphatase

Table S2. Primer sequences.

| Gene                          | Forward                  | Reversed                 |
|-------------------------------|--------------------------|--------------------------|
| <b><u>Human</u></b>           |                          |                          |
| $\alpha$ -smooth muscle actin | TTGCCTGATGGGCAAGTGAT     | GTGGTTTCATGGATGCCAGC     |
| Collagen-1 $\alpha$ 1         | GGAACCTGGGGCAAGACAGT     | GAGGGAACCAGATTGGGGTG     |
| Cripto (human)                | CACGATGTGCGCAAAGAGAA     | TGACCGTGCCAGCATTTACA     |
| $\beta$ -actin (human)        | AATGTCGCGGAGGACTTTGATTGC | GGATGGCAAGGGACTTCCTGTAAA |
| <b><u>Mouse</u></b>           |                          |                          |
| $\alpha$ -smooth muscle actin | GTCCCAGACATCAGGGAGTAA    | TCGGATACTTCAGCGTCAGGA    |
| Collagen-1 $\alpha$ 1         | GTGGAAACCCGAGCCCTGCC     | TCCCTTGGGTCCCTCGACGC     |
| Cripto (mouse)                | CGCCAGCTAGCATAAAAGTG     | CCCAAGAAGTGTTCCCTGTG     |
| $\beta$ -actin (mouse)        | GGGGTGTTGAAGGTCTCAAA     | AGAAAATCTGGCACCCC        |
